# Supplementary material for: “Surthriving” Hand Rehabilitation: Proposing Interventions to Support Novice Occupational Therapists Working in Underserved Contexts
Source: Occup Ther Int. 2023 Dec 14;2023:5562025. doi: 10.1155/2023/5562025 (PMC10735728; doi:10.1155/2023/5562025)
Supplement: Supplementary 2 — Record of member checking conducted with all participants. [file 5562025.f2.xlsx]

## Sheet: Blank
Number of hand patients each month
Percentage of caseload
Synopsis of experience delivering hand-injury care
Synopsis of CS placement
Most memorable aspect/patient
How did you experience delivering hand-injury care in CS?
Pseudonym / Avatar & brief reason
		Resonates?	Comment	Suggested change
Composite vignette
Theme 1: Submerged
1.1	Circle of poverty
1.2	Strained system
1.3	Contraptions & contractures
1.4	Insurmountable need
1.5	Connecting through diversity
Theme 2: Starting somewhere
2.1	No idea
2.2	Finding directions
2.3	I know there's a protocol but…
2.4	Sparse equipping
2.5	Seeing hands as OT
Theme 3: Dynamics of Surthrival
3.1	Propelled by demand
3.2	Agentic Momentum
3.3	Support for learning
3.4	Resources
3.5	Emotional support
3.6	Catalysts
WHAT are the support and development needs?
	​	System/Service​	Knowledge, skill, professional behaviour​	Resources​	Emotional support​
	Submerged​					Comment / Disagree / Suggestions
1.1	Circle of Poverty​	*Systemic development *OT resourcing in other sectors (?CS)	*Population intervention / promotion & prevention	​	*Preparation for CS *Processing experiences *Supported reflection
1.2	Strained System​	​	*Managing & strengthening sustainable services *Navigating myself in a system with a history *Personal & professional skills (incl. resilience)	​	​* Preparation
1.3	Contraptions & contractures​	​*Improvement in basic management of hand injuries/conditions *strengthening of human resources (medical & surgical) *strengthening referral systems	​*preventing &treating secondary complications	​	*Debriefing /processing / sharing experiences ​* Preparation
1.4	Insurmountable need​	​	*Resilience *Professional skills	​	*Debriefing /processing / sharing experiences ​ * Preparation
1.5	Connecting through diversity​	​*Human resourcing to reduce language discordance	* Preparation *Cultural humility *Language learning *Effective use of interpreter *Responding to traditional healing practices	​	​*Debriefing /processing / sharing experiences ​* Preparation
	Starting somewhere​					Comment / Disagree / Suggestions
2.1	No idea to some idea​	​	​*Guidance *Feedback *Support for the development of clinical reasoning	​	​*Debriefing /processing / sharing experiences ​* Preparation
2.2	Finding directions​	​	​​*Guidance *Feedback *Support for the development of , knowledge, skill & clinical reasoning (Ax & Rx) *Accessing appropriate evidence *Mx acute conditions & injuries * Mx chronic conditions *Mx Burnt hand * Mx fractures *Mx stroke UL *Reasoning around DG eligibility	​*Appropriate guidelines	*Sharing experiences ​* Preparation
2.3	I know there’s a protocol but…​	​	*Supporting adherence	​​*Appropriate guidelines *Appropriate home programmes * Mobile Ax & Rx resources	*​Sharing experiences ​* Preparation
2.4	Sparse equipping​	​*Human resourcing * Strengthening supervision capacity	​*strengthening UG Curricula * Practical UG experiences *Regular opportuniites ro develop knowledge & skill *strengthening resourcefulness, creativity & innovation	* Appropriate HT equipment & resources	​
2.5	Seeing hands as OT ​	​	​*fostering enjoyable UG experiences; *Strengthening occupational focus in UG HT teaching *OBHT opportunities *Understanding indigenous occupations & drawing them into therapy	*​OBHT resources suitable for diverse caseload *Activity ideas	​
	Dynamics of surthrival ​					Comment / Disagree / Suggestions
3.1	Agentic momentum ​	​	​*supporting development of agency *supporting development of lifelong learning practices	​	​
3.2	Propelled by demand​	​	​	*Resources for diverse caseload	Preparation
3.3	Emotional supports​	*Responsive supervision	* Resilience (incl. coping strategies, building/harnessing support networks)	​	​*Debriefing /processing / sharing experience
3.4	Resources​	*Strengthening referral systems	​	Appropriate resources	​
3.5	Support for learning​	​? Appropriate courses	​*Strengthening UG experiences ​*Individual & group reflection *case discussion	​*Appropriate courses	​
3.6	Catalysts ​	*Accessible (immediacy & proximity) support & supervision *Access to expertise		​? Access to expertise	​

## Sheet: Illusionless Optimist
Number of hand patients each month		20-30
Percentage of caseload		0.3
Synopsis of experience delivering hand-injury care		It was a great experience. Great to get some experience with hand therapy, as I didn't have that really as a student. Also very intimidating as I had never worked with hand therapy before and now I was all on my own having to figure out protocols and treatment plans. Quite frustating as well as most of the time hand therapy patients didn't recover because due to service delivery and resource cons…
Synopsis of CS placement		Deep rural town (more of a village really) nestled in the Eastern Cape mountains, close to the foothills of the Drakensburg. Beautiful, but very rural!
Most memorable aspect/patient		My most memorable patient was a young man who had a perilunate dislocation. It was really incredible because through reaching out to experts I was able to figure out what was wrong where I would never have been able to work it out on my own - a great reassurance that even though you are alone, you do have access to help. It was also really sad though because even though we were able to figure out…
How did you experience delivering hand-injury care in CS?
Pseudonym / Avatar & brief reason		Illusionless optimist
		Resonates?	Comment	Suggested change
Composite vignette		Yes
Theme 1: Submerged		Yes
1.1	Circle of poverty	Yes
1.2	Strained system	Yes
1.3	Contraptions & contractures	Yes
1.4	Insurmountable need	Yes
1.5	Connecting through diversity	Yes
Theme 2: Starting somewhere		Yes
2.1	No idea	Yes
2.2	Finding directions	Yes
2.3	I know there's a protocol but…	Yes
2.4	Sparse equipping	Yes
2.5	Seeing hands as OT	Yes
Theme 3: Dynamics of Surthrival		Yes	Love the term!
3.1	Propelled by demand	Yes
3.2	Agentic Momentum	Yes	I really liked this theme! I think it's really important
3.3	Support for learning	Yes
3.4	Resources	Yes
3.5	Emotional support	Yes
3.6	Catalysts	Yes	100% agree!
WHAT are the support and development needs?
	​	System/Service​	Knowledge, skill, professional behaviour​	Resources​	Emotional support​
	Submerged​					Comment / Disagree / Suggestions
1.1	Circle of Poverty​	*Systemic development *OT resourcing in other sectors (?CS)	*Population intervention / promotion & prevention	​	*Preparation for CS *Processing experiences *Supported reflection
1.2	Strained System​	​	*Managing & strengthening sustainable services *Navigating myself in a system with a history *Personal & professional skills (incl. resilience)	​	​* Preparation
1.3	Contraptions & contractures​	​*Improvement in basic management of hand injuries/conditions *strengthening of human resources (medical & surgical) *strengthening referral systems	​*preventing &treating secondary complications	​	*Debriefing /processing / sharing experiences ​* Preparation
1.4	Insurmountable need​	​	*Resilience *Professional skills	​	*Debriefing /processing / sharing experiences ​ * Preparation
1.5	Connecting through diversity​	​*Human resourcing to reduce language discordance	* Preparation *Cultural humility *Language learning *Effective use of interpreter *Responding to traditional healing practices	​	​*Debriefing /processing / sharing experiences ​* Preparation
	Starting somewhere​					Comment / Disagree / Suggestions
2.1	No idea to some idea​	​	​*Guidance *Feedback *Support for the development of clinical reasoning	​	​*Debriefing /processing / sharing experiences ​* Preparation
2.2	Finding directions​	​	​​*Guidance *Feedback *Support for the development of , knowledge, skill & clinical reasoning (Ax & Rx) *Accessing appropriate evidence *Mx acute conditions & injuries * Mx chronic conditions *Mx Burnt hand * Mx fractures *Mx stroke UL *Reasoning around DG eligibility	​*Appropriate guidelines	*Sharing experiences ​* Preparation
2.3	I know there’s a protocol but…​	​	*Supporting adherence	​​*Appropriate guidelines *Appropriate home programmes * Mobile Ax & Rx resources	*​Sharing experiences ​* Preparation
2.4	Sparse equipping​	​*Human resourcing * Strengthening supervision capacity	​*strengthening UG Curricula * Practical UG experiences *Regular opportuniites ro develop knowledge & skill *strengthening resourcefulness, creativity & innovation	* Appropriate HT equipment & resources	​
2.5	Seeing hands as OT ​	​	​*fostering enjoyable UG experiences; *Strengthening occupational focus in UG HT teaching *OBHT opportunities *Understanding indigenous occupations & drawing them into therapy	*​OBHT resources suitable for diverse caseload *Activity ideas	​
	Dynamics of surthrival ​					Comment / Disagree / Suggestions
3.1	Agentic momentum ​	​	​*supporting development of agency *supporting development of lifelong learning practices	​	​
3.2	Propelled by demand​	​	​	*Resources for diverse caseload	Preparation
3.3	Emotional supports​	*Responsive supervision	* Resilience (incl. coping strategies, building/harnessing support networks)	​	​*Debriefing /processing / sharing experience
3.4	Resources​	*Strengthening referral systems	​	Appropriate resources	​
3.5	Support for learning​	​? Appropriate courses	​*Strengthening UG experiences ​*Individual & group reflection *case discussion	​*Appropriate courses	​
3.6	Catalysts ​	*Accessible (immediacy & proximity) support & supervision *Access to expertise		​? Access to expertise	​

## Sheet: Bad Grad
Number of hand patients each month		100
Percentage of caseload		When in ortho, 80% of case load
Synopsis of experience delivering hand-injury care		Had a briliiant supervisor who was able to assist in the teaching and guidance of hand injuries so I was very fortunate. However, we most dealt with late referral tendon injuries and mostly sepnt time trying to fix the doctors mistakes (ie. lack of experience, mismanagement and late referral)
Synopsis of CS placement		900 bed hospital, saw a variety of patients in the hosptial and was able to provide inpateint and out pateint treatment
Most memorable aspect/patient		Learning from an OT who has had tons of expereince in hands as well as a hand diploma
How did you experience delivering hand-injury care in CS?
Pseudonym / Avatar & brief reason		The Bad Grad
		Resonates?	Comment	Suggested change
Composite vignette		Yes	Good	For physio assessment
Theme 1: Submerged		Yes
1.1	Circle of poverty	Yes
1.2	Strained system	Partially	Context different to other members
1.3	Contraptions & contractures	Yes
1.4	Insurmountable need	Yes
1.5	Connecting through diversity	Yes
Theme 2: Starting somewhere		Yes
2.1	No idea	Yes
2.2	Finding directions	Yes
2.3	I know there's a protocol but…	Yes
2.4	Sparse equipping	Yes
2.5	Seeing hands as OT	Yes
Theme 3: Dynamics of Surthrival
3.1	Propelled by demand	Yes
3.2	Agentic Momentum	Yes
3.3	Support for learning	Yes
3.4	Resources	Yes
3.5	Emotional support	Yes
3.6	Catalysts	Yes
WHAT are the support and development needs?
	​	System/Service​	Knowledge, skill, professional behaviour​	Resources​	Emotional support​
	Submerged​					Comment / Disagree / Suggestions
1.1	Circle of Poverty​	*Systemic development *OT resourcing in other sectors (?CS)	*Population intervention / promotion & prevention	​	*Preparation for CS *Processing experiences *Supported reflection
1.2	Strained System​	​	*Managing & strengthening sustainable services *Navigating myself in a system with a history *Personal & professional skills (incl. resilience)	​	​* Preparation
1.3	Contraptions & contractures​	​*Improvement in basic management of hand injuries/conditions *strengthening of human resources (medical & surgical) *strengthening referral systems	​*preventing &treating secondary complications	​	*Debriefing /processing / sharing experiences ​* Preparation
1.4	Insurmountable need​	​	*Resilience *Professional skills	​	*Debriefing /processing / sharing experiences ​ * Preparation
1.5	Connecting through diversity​	​*Human resourcing to reduce language discordance	* Preparation *Cultural humility *Language learning *Effective use of interpreter *Responding to traditional healing practices	​	​*Debriefing /processing / sharing experiences ​* Preparation
	Starting somewhere​					Comment / Disagree / Suggestions
2.1	No idea to some idea​	​	​*Guidance *Feedback *Support for the development of clinical reasoning	​	​*Debriefing /processing / sharing experiences ​* Preparation
2.2	Finding directions​	​	​​*Guidance *Feedback *Support for the development of , knowledge, skill & clinical reasoning (Ax & Rx) *Accessing appropriate evidence *Mx acute conditions & injuries * Mx chronic conditions *Mx Burnt hand * Mx fractures *Mx stroke UL *Reasoning around DG eligibility	​*Appropriate guidelines	*Sharing experiences ​* Preparation
2.3	I know there’s a protocol but…​	​	*Supporting adherence	​​*Appropriate guidelines *Appropriate home programmes * Mobile Ax & Rx resources	*​Sharing experiences ​* Preparation
2.4	Sparse equipping​	​*Human resourcing * Strengthening supervision capacity	​*strengthening UG Curricula * Practical UG experiences *Regular opportuniites ro develop knowledge & skill *strengthening resourcefulness, creativity & innovation	* Appropriate HT equipment & resources	​
2.5	Seeing hands as OT ​	​	​*fostering enjoyable UG experiences; *Strengthening occupational focus in UG HT teaching *OBHT opportunities *Understanding indigenous occupations & drawing them into therapy	*​OBHT resources suitable for diverse caseload *Activity ideas	​
	Dynamics of surthrival ​					Comment / Disagree / Suggestions
3.1	Agentic momentum ​	​	​*supporting development of agency *supporting development of lifelong learning practices	​	​
3.2	Propelled by demand​	​	​	*Resources for diverse caseload	Preparation
3.3	Emotional supports​	*Responsive supervision	* Resilience (incl. coping strategies, building/harnessing support networks)	​	​*Debriefing /processing / sharing experience
3.4	Resources​	*Strengthening referral systems	​	Appropriate resources	​
3.5	Support for learning​	​? Appropriate courses	​*Strengthening UG experiences ​*Individual & group reflection *case discussion	​*Appropriate courses	​
3.6	Catalysts ​	*Accessible (immediacy & proximity) support & supervision *Access to expertise		​? Access to expertise	​

## Sheet: Tired and Trying
Number of hand patients each month		40
Percentage of caseload		0.4
Synopsis of experience delivering hand-injury care		Frustrating yet rewarding when youre able to get it right
Synopsis of CS placement		tiny rural hospital nestled between rondawels, rolling hills and the ocean. Not much around besides goats, cows and a few chickens
Most memorable aspect/patient		9 year old patient with burns on the right hand. Able to get her to return to school
How did you experience delivering hand-injury care in CS?
Pseudonym / Avatar & brief reason		Tired and trying
		Resonates?	Comment	Suggested change
Composite vignette		Yes	Amazing! Gives me goose bumps and makes me emotional
Theme 1: Submerged		Yes
1.1	Circle of poverty	Yes
1.2	Strained system	Yes	I feel that this was the centre of my experience of comserve, I often felt I was spending more time fighting the system than actually working with patients
1.3	Contraptions & contractures	Yes
1.4	Insurmountable need	Yes
1.5	Connecting through diversity	Yes
Theme 2: Starting somewhere		Yes
2.1	No idea	Yes
2.2	Finding directions	Yes
2.3	I know there's a protocol but…	Yes
2.4	Sparse equipping	Yes	Undergrad experience was so minimal for me so I really resonate with that
2.5	Seeing hands as OT	Yes
Theme 3: Dynamics of Surthrival		Yes
3.1	Propelled by demand	Yes
3.2	Agentic Momentum	Yes	especially taking it upon myself to learn a new language
3.3	Support for learning	Partially	the CoP did the most of this for me ... the rest not so much
3.4	Resources	No	I feel like i was completely on my own and didnt really have many resources
3.5	Emotional support	Yes	needed a psychologist to make it through the year
3.6	Catalysts	Yes
WHAT are the support and development needs?
	​	System/Service​	Knowledge, skill, professional behaviour​	Resources​	Emotional support​
	Submerged​					Comment / Disagree / Suggestions
1.1	Circle of Poverty​	*Systemic development *OT resourcing in other sectors (?CS)	*Population intervention / promotion & prevention	​	*Preparation for CS *Processing experiences *Supported reflection	OT comserve posts in other government sectors esp DoE
1.2	Strained System​	​	*Managing & strengthening sustainable services *Navigating myself in a system with a history *Personal & professional skills (incl. resilience)	​	​* Preparation
1.3	Contraptions & contractures​	​*Improvement in basic management of hand injuries/conditions *strengthening of human resources (medical & surgical) *strengthening referral systems	​*preventing &treating secondary complications	​	*Debriefing /processing / sharing experiences ​* Preparation
1.4	Insurmountable need​	​	*Resilience *Professional skills	​	*Debriefing /processing / sharing experiences ​ * Preparation
1.5	Connecting through diversity​	​*Human resourcing to reduce language discordance	* Preparation *Cultural humility *Language learning *Effective use of interpreter *Responding to traditional healing practices	​	​*Debriefing /processing / sharing experiences ​* Preparation
	Starting somewhere​					Comment / Disagree / Suggestions
2.1	No idea to some idea​	​	​*Guidance *Feedback *Support for the development of clinical reasoning	​	​*Debriefing /processing / sharing experiences ​* Preparation
2.2	Finding directions​	​	​​*Guidance *Feedback *Support for the development of , knowledge, skill & clinical reasoning (Ax & Rx) *Accessing appropriate evidence *Mx acute conditions & injuries * Mx chronic conditions *Mx Burnt hand * Mx fractures *Mx stroke UL *Reasoning around DG eligibility	​*Appropriate guidelines	*Sharing experiences ​* Preparation
2.3	I know there’s a protocol but…​	​	*Supporting adherence	​​*Appropriate guidelines *Appropriate home programmes * Mobile Ax & Rx resources	*​Sharing experiences ​* Preparation
2.4	Sparse equipping​	​*Human resourcing * Strengthening supervision capacity	​*strengthening UG Curricula * Practical UG experiences *Regular opportuniites ro develop knowledge & skill *strengthening resourcefulness, creativity & innovation	* Appropriate HT equipment & resources	​
2.5	Seeing hands as OT ​	​	​*fostering enjoyable UG experiences; *Strengthening occupational focus in UG HT teaching *OBHT opportunities *Understanding indigenous occupations & drawing them into therapy	*​OBHT resources suitable for diverse caseload *Activity ideas	​
	Dynamics of surthrival ​					Comment / Disagree / Suggestions
3.1	Agentic momentum ​	​	​*supporting development of agency *supporting development of lifelong learning practices	​	​
3.2	Propelled by demand​	​	​	*Resources for diverse caseload	Preparation
3.3	Emotional supports​	*Responsive supervision	* Resilience (incl. coping strategies, building/harnessing support networks)	​	​*Debriefing /processing / sharing experience
3.4	Resources​	*Strengthening referral systems	​	Appropriate resources	​
3.5	Support for learning​	​? Appropriate courses	​*Strengthening UG experiences ​*Individual & group reflection *case discussion	​*Appropriate courses	​
3.6	Catalysts ​	*Accessible (immediacy & proximity) support & supervision *Access to expertise		​? Access to expertise	​	Some kind of mentorship program where you can have access to a experience hand therapist

## Sheet: Anx-cited Outsider
Number of hand patients each month		plus minus 32
Percentage of caseload		0.2
Synopsis of experience delivering hand-injury care		Learnt a lot, despite the lack of guidance and resources. Consolidating some of what was learnt at varsity.
Synopsis of CS placement		District hospital in Rural Mpumalanga, frequent home and clinic visits, weekly Hand clinics in OT department.
Most memorable aspect/patient		Neuro patient who was stabbed in the head with a knife by someone trying to steal his beer, when restrictions made beer scarce during Covid.
How did you experience delivering hand-injury care in CS?
Pseudonym / Avatar & brief reason		Anxious and excited infiltrator - out of my place, different culture but eager to learn.
		Resonates?	Comment	Suggested change
Composite vignette		Yes	Takes me back, made my eyes tear up to think of it again. Also made me sort of miss it?
Theme 1: Submerged		Yes
1.1	Circle of poverty	Yes
1.2	Strained system	Yes
1.3	Contraptions & contractures	Yes
1.4	Insurmountable need	Yes
1.5	Connecting through diversity	Yes	Feeling "South-African", learning about culture and heritage and enriching my own view
Theme 2: Starting somewhere		Yes
2.1	No idea	Yes
2.2	Finding directions	Yes
2.3	I know there's a protocol but…	Yes
2.4	Sparse equipping	Yes	Expired materials, Complacent permanent OT's
2.5	Seeing hands as OT	Yes	Yes! Thank you for the reminder again :)
Theme 3: Dynamics of Surthrival		Yes
3.1	Propelled by demand	Yes	Thanks Google
3.2	Agentic Momentum	Yes
3.3	Support for learning	Partially	Needed for surthrival, limited in CS and undergrad
3.4	Resources	Yes
3.5	Emotional support	Yes	YES
3.6	Catalysts	Yes
WHAT are the support and development needs?
	​	System/Service​	Knowledge, skill, professional behaviour​	Resources​	Emotional support​
	Submerged​					Comment / Disagree / Suggestions
1.1	Circle of Poverty​	*Systemic development *OT resourcing in other sectors (?CS)	*Population intervention / promotion & prevention	​	*Preparation for CS *Processing experiences *Supported reflection
1.2	Strained System​	​	*Managing & strengthening sustainable services *Navigating myself in a system with a history *Personal & professional skills (incl. resilience)	​	​* Preparation
1.3	Contraptions & contractures​	​*Improvement in basic management of hand injuries/conditions *strengthening of human resources (medical & surgical) *strengthening referral systems	​*preventing &treating secondary complications	​	*Debriefing /processing / sharing experiences ​* Preparation
1.4	Insurmountable need​	​	*Resilience *Professional skills	​	*Debriefing /processing / sharing experiences ​ * Preparation
1.5	Connecting through diversity​	​*Human resourcing to reduce language discordance	* Preparation *Cultural humility *Language learning *Effective use of interpreter *Responding to traditional healing practices	​	​*Debriefing /processing / sharing experiences ​* Preparation
	Starting somewhere​					Comment / Disagree / Suggestions
2.1	No idea to some idea​	​	​*Guidance *Feedback *Support for the development of clinical reasoning	​	​*Debriefing /processing / sharing experiences ​* Preparation
2.2	Finding directions​	​	​​*Guidance *Feedback *Support for the development of , knowledge, skill & clinical reasoning (Ax & Rx) *Accessing appropriate evidence *Mx acute conditions & injuries * Mx chronic conditions *Mx Burnt hand * Mx fractures *Mx stroke UL *Reasoning around DG eligibility	​*Appropriate guidelines	*Sharing experiences ​* Preparation
2.3	I know there’s a protocol but…​	​	*Supporting adherence	​​*Appropriate guidelines *Appropriate home programmes * Mobile Ax & Rx resources	*​Sharing experiences ​* Preparation
2.4	Sparse equipping​	​*Human resourcing * Strengthening supervision capacity	​*strengthening UG Curricula * Practical UG experiences *Regular opportuniites ro develop knowledge & skill *strengthening resourcefulness, creativity & innovation	* Appropriate HT equipment & resources	​
2.5	Seeing hands as OT ​	​	​*fostering enjoyable UG experiences; *Strengthening occupational focus in UG HT teaching *OBHT opportunities *Understanding indigenous occupations & drawing them into therapy	*​OBHT resources suitable for diverse caseload *Activity ideas	​
	Dynamics of surthrival ​					Comment / Disagree / Suggestions
3.1	Agentic momentum ​	​	​*supporting development of agency *supporting development of lifelong learning practices	​	​
3.2	Propelled by demand​	​	​	*Resources for diverse caseload	Preparation
3.3	Emotional supports​	*Responsive supervision	* Resilience (incl. coping strategies, building/harnessing support networks)	​	​*Debriefing /processing / sharing experience
3.4	Resources​	*Strengthening referral systems	​	Appropriate resources	​
3.5	Support for learning​	​? Appropriate courses	​*Strengthening UG experiences ​*Individual & group reflection *case discussion	​*Appropriate courses	​
3.6	Catalysts ​	*Accessible (immediacy & proximity) support & supervision *Access to expertise		​? Access to expertise	​

## Sheet: Growing OT
Number of hand patients each month		20
Percentage of caseload		0.5
Synopsis of experience delivering hand-injury care		initially daunting but I became more comfortable and confident and then started to enjoy treating these patients. Frustration around the medical management of these cases.
Synopsis of CS placement		deep rural hospital that was under reasourced as well as 16 rural clinics in the area
Most memorable aspect/patient		getting some patients to return to work
How did you experience delivering hand-injury care in CS?
Pseudonym / Avatar & brief reason		Growing therapist
		Resonates?	Comment	Suggested change
Composite vignette		Yes	really enjoyed this
Theme 1: Submerged		Yes
1.1	Circle of poverty	Yes	can I say super yes? this was a big factor for me
1.2	Strained system	Yes	patients even waiting weeks to go for a tendon repair
1.3	Contraptions & contractures	Yes	Love this! often got the referral too late
1.4	Insurmountable need	Yes	Lots of traumatic hand injuries
1.5	Connecting through diversity	Yes	really enjoyed kearning from my patients cultures
Theme 2: Starting somewhere		Yes
2.1	No idea	Yes	I was the most knowledgable to the other more experienced therapists in my deparment	to some idea
2.2	Finding directions	Yes	often googled and paged through my university hands book
2.3	I know there's a protocol but…	Yes	seeing pain and contractures without diagnosis and adding a language barrier
2.4	Sparse equipping	Yes
2.5	Seeing hands as OT	Yes	very much medical model but enjoyed learning the link
Theme 3: Dynamics of Surthrival		Yes	love this title
3.1	Propelled by demand	Yes	was forced to learn for sure
3.2	Agentic Momentum	Yes	Didnt think about it like this :)
3.3	Support for learning	Yes
3.4	Resources	Partially
3.5	Emotional support	Yes	this was an important factor for me. Saw lots of abuse/violent crimes etc
3.6	Catalysts	Yes	real time support!!
WHAT are the support and development needs?
	​	System/Service​	Knowledge, skill, professional behaviour​	Resources​	Emotional support​
	Submerged​					Comment / Disagree / Suggestions
1.1	Circle of Poverty​	*Systemic development *OT resourcing in other sectors (?CS)	*Population intervention / promotion & prevention	​	*Preparation for CS *Processing experiences *Supported reflection	agree- many patients were unemployed, no electricity , water or working in informal employment
1.2	Strained System​	​	*Managing & strengthening sustainable services *Navigating myself in a system with a history *Personal & professional skills (incl. resilience)	​	​* Preparation	agree- not getting the correct care
1.3	Contraptions & contractures​	​*Improvement in basic management of hand injuries/conditions *strengthening of human resources (medical & surgical) *strengthening referral systems	​*preventing &treating secondary complications	​	*Debriefing /processing / sharing experiences ​* Preparation	agree
1.4	Insurmountable need​	​	*Resilience *Professional skills	​	*Debriefing /processing / sharing experiences ​ * Preparation	agree
1.5	Connecting through diversity​	​*Human resourcing to reduce language discordance	* Preparation *Cultural humility *Language learning *Effective use of interpreter *Responding to traditional healing practices	​	​*Debriefing /processing / sharing experiences ​* Preparation	agree- loved this part of my experience
	Starting somewhere​					Comment / Disagree / Suggestions
2.1	No idea to some idea​	​	​*Guidance *Feedback *Support for the development of clinical reasoning	​	​*Debriefing /processing / sharing experiences ​* Preparation	agree
2.2	Finding directions​	​	​​*Guidance *Feedback *Support for the development of , knowledge, skill & clinical reasoning (Ax & Rx) *Accessing appropriate evidence *Mx acute conditions & injuries * Mx chronic conditions *Mx Burnt hand * Mx fractures *Mx stroke UL *Reasoning around DG eligibility	​*Appropriate guidelines	*Sharing experiences ​* Preparation	agree
2.3	I know there’s a protocol but…​	​	*Supporting adherence	​​*Appropriate guidelines *Appropriate home programmes * Mobile Ax & Rx resources	*​Sharing experiences ​* Preparation	agree
2.4	Sparse equipping​	​*Human resourcing * Strengthening supervision capacity	​*strengthening UG Curricula * Practical UG experiences *Regular opportuniites ro develop knowledge & skill *strengthening resourcefulness, creativity & innovation	* Appropriate HT equipment & resources	​	AGREE
2.5	Seeing hands as OT ​	​	​*fostering enjoyable UG experiences; *Strengthening occupational focus in UG HT teaching *OBHT opportunities *Understanding indigenous occupations & drawing them into therapy	*​OBHT resources suitable for diverse caseload *Activity ideas	​	agree- loved the positive spin
	Dynamics of surthrival ​					Comment / Disagree / Suggestions
3.1	Agentic momentum ​	​	​*supporting development of agency *supporting development of lifelong learning practices	​	​	agree- love this
3.2	Propelled by demand​	​	​	*Resources for diverse caseload	Preparation	agree
3.3	Emotional supports​	*Responsive supervision	* Resilience (incl. coping strategies, building/harnessing support networks)	​	​*Debriefing /processing / sharing experience	agree
3.4	Resources​	*Strengthening referral systems	​	Appropriate resources	​	agree
3.5	Support for learning​	​? Appropriate courses	​*Strengthening UG experiences ​*Individual & group reflection *case discussion	​*Appropriate courses	​
3.6	Catalysts ​	*Accessible (immediacy & proximity) support & supervision *Access to expertise		​? Access to expertise	​	community of practice honestly made my comm serv experience

## Sheet: Solo worker bee
Number of hand patients each month		40
Percentage of caseload		40/200
Synopsis of experience delivering hand-injury care		let's see what we can do
Synopsis of CS placement		Driving door to door, carrying the world
Most memorable aspect/patient		CP splinting and parent support groups
How did you experience delivering hand-injury care in CS?
Pseudonym / Avatar & brief reason		Solo worker bee
		Resonates?	Comment	Suggested change
Composite vignette
Theme 1: Submerged		Yes
1.1	Circle of poverty	Yes
1.2	Strained system	Yes
1.3	Contraptions & contractures	Yes
1.4	Insurmountable need	Yes
1.5	Connecting through diversity	Yes
Theme 2: Starting somewhere		Yes
2.1	No idea	Partially
2.2	Finding directions	Yes
2.3	I know there's a protocol but…	Yes
2.4	Sparse equipping	Yes
2.5	Seeing hands as OT	Yes
Theme 3: Dynamics of Surthrival		Yes
3.1	Propelled by demand	Yes
3.2	Agentic Momentum	Yes
3.3	Support for learning	Yes
3.4	Resources	Yes
3.5	Emotional support	Partially
3.6	Catalysts	Yes
WHAT are the support and development needs?
	​	System/Service​	Knowledge, skill, professional behaviour​	Resources​	Emotional support​
	Submerged​					Comment / Disagree / Suggestions
1.1	Circle of Poverty​	*Systemic development *OT resourcing in other sectors (?CS)	*Population intervention / promotion & prevention	​	*Preparation for CS *Processing experiences *Supported reflection	Agree- patients were mainly laborers and domestic workers who really need their hands for employment and sustaining their families
1.2	Strained System​	​	*Managing & strengthening sustainable services *Navigating myself in a system with a history *Personal & professional skills (incl. resilience)	​	​* Preparation	Agree - government needs to employ more OTs and provide more resources for hand therapy as well as in the health sector in general - Burn out is real
1.3	Contraptions & contractures​	​*Improvement in basic management of hand injuries/conditions *strengthening of human resources (medical & surgical) *strengthening referral systems	​*preventing &treating secondary complications	​	*Debriefing /processing / sharing experiences ​* Preparation	Agree - mismanagement of hands patients
1.4	Insurmountable need​	​	*Resilience *Professional skills	​	*Debriefing /processing / sharing experiences ​ * Preparation	Agree- True being the only OT was tough not having anyone to learn from or ask questions
1.5	Connecting through diversity​	​*Human resourcing to reduce language discordance	* Preparation *Cultural humility *Language learning *Effective use of interpreter *Responding to traditional healing practices	​	​*Debriefing /processing / sharing experiences ​* Preparation	Agree - all different languages and learning different cultures, adding to the meaning and purpose to a patients life
	Starting somewhere​					Comment / Disagree / Suggestions
2.1	No idea to some idea​	​	​*Guidance *Feedback *Support for the development of clinical reasoning	​	​*Debriefing /processing / sharing experiences ​* Preparation	Some idea 💡 and getting more experience
2.2	Finding directions​	​	​​*Guidance *Feedback *Support for the development of , knowledge, skill & clinical reasoning (Ax & Rx) *Accessing appropriate evidence *Mx acute conditions & injuries * Mx chronic conditions *Mx Burnt hand * Mx fractures *Mx stroke UL *Reasoning around DG eligibility	​*Appropriate guidelines	*Sharing experiences ​* Preparation	Agree - lack of diagnosis which means we have to treat symptoms
2.3	I know there’s a protocol but…​	​	*Supporting adherence	​​*Appropriate guidelines *Appropriate home programmes * Mobile Ax & Rx resources	*​Sharing experiences ​* Preparation	Agree - patients come so late for therapy and are mismanaged - where to go from there
2.4	Sparse equipping​	​*Human resourcing * Strengthening supervision capacity	​*strengthening UG Curricula * Practical UG experiences *Regular opportuniites ro develop knowledge & skill *strengthening resourcefulness, creativity & innovation	* Appropriate HT equipment & resources	​	Agree - running out of splinting materials and not having thr tools that we need to do therapy, have to be creative and use all sorts of items that could work instead
2.5	Seeing hands as OT ​	​	​*fostering enjoyable UG experiences; *Strengthening occupational focus in UG HT teaching *OBHT opportunities *Understanding indigenous occupations & drawing them into therapy	*​OBHT resources suitable for diverse caseload *Activity ideas	​	Agree - OT is hands
	Dynamics of surthrival ​					Comment / Disagree / Suggestions
3.1	Agentic momentum ​	​	​*supporting development of agency *supporting development of lifelong learning practices	​	​	Agree
3.2	Propelled by demand​	​	​	*Resources for diverse caseload	Preparation	Agree - had to go and ask for support from OTs at the hospital
3.3	Emotional supports​	*Responsive supervision	* Resilience (incl. coping strategies, building/harnessing support networks)	​	​*Debriefing /processing / sharing experience	Agree -identified the need for OT supervisor and Pets
3.4	Resources​	*Strengthening referral systems	​	Appropriate resources	​	Agree
3.5	Support for learning​	​? Appropriate courses	​*Strengthening UG experiences ​*Individual & group reflection *case discussion	​*Appropriate courses	​	Agree - colleagues help phone for help
3.6	Catalysts ​	*Accessible (immediacy & proximity) support & supervision *Access to expertise		​? Access to expertise	​	Agree - real time support

## Sheet: Find-a-way OT
Number of hand patients each month		32
Percentage of caseload		0.3
Synopsis of experience delivering hand-injury care		Was challenging and put my clinical reasoning to work, often required more supervison/help than what I got.
Synopsis of CS placement		Large rural hospital in a very HOT area
Most memorable aspect/patient		Thoses that you saw you were making a difference with. They were also always very grateful. Sadly being low resourced with little supervision/support is also very memorbale.
How did you experience delivering hand-injury care in CS?
Pseudonym / Avatar & brief reason		The find-a-way OT
		Resonates?	Comment	Suggested change
Composite vignette		Yes	I never visted clincis as I was at a regional hospital, but could really relate to the patients mentioned and the struggles.
Theme 1: Submerged		Yes
1.1	Circle of poverty	Yes
1.2	Strained system	Yes
1.3	Contraptions & contractures	Yes
1.4	Insurmountable need	Yes
1.5	Connecting through diversity	Partially	Sadly at times the diversity added to a disconnection
Theme 2: Starting somewhere		Yes
2.1	No idea	Yes	This was due to often not having a proper diagnosis or restraint resources	"No idea to some idea"
2.2	Finding directions	Yes	agree a lot with guidance
2.3	I know there's a protocol but…	Yes
2.4	Sparse equipping	Yes
2.5	Seeing hands as OT	Partially	personally didn't have to learn to like hand therpay and see it as OT, but did learn to love it more
Theme 3: Dynamics of Surthrival		Yes
3.1	Propelled by demand	Yes
3.2	Agentic Momentum	Yes
3.3	Support for learning	Yes
3.4	Resources	Partially	Was not able to refer as I was the up referral	Up referral not always an option
3.5	Emotional support	Yes
3.6	Catalysts	Yes
WHAT are the support and development needs?
	​	System/Service​	Knowledge, skill, professional behaviour​	Resources​	Emotional support​
	Submerged​					Comment / Disagree / Suggestions
1.1	Circle of Poverty​	*Systemic development *OT resourcing in other sectors (?CS)	*Population intervention / promotion & prevention	​	*Preparation for CS *Processing experiences *Supported reflection
1.2	Strained System​	​	*Managing & strengthening sustainable services *Navigating myself in a system with a history *Personal & professional skills (incl. resilience)	​	​* Preparation
1.3	Contraptions & contractures​	​*Improvement in basic management of hand injuries/conditions *strengthening of human resources (medical & surgical) *strengthening referral systems	​*preventing &treating secondary complications	​	*Debriefing /processing / sharing experiences ​* Preparation
1.4	Insurmountable need​	​	*Resilience *Professional skills	​	*Debriefing /processing / sharing experiences ​ * Preparation
1.5	Connecting through diversity​	​*Human resourcing to reduce language discordance	* Preparation *Cultural humility *Language learning *Effective use of interpreter *Responding to traditional healing practices	​	​*Debriefing /processing / sharing experiences ​* Preparation
	Starting somewhere​					Comment / Disagree / Suggestions
2.1	No idea to some idea​	​	​*Guidance *Feedback *Support for the development of clinical reasoning	​	​*Debriefing /processing / sharing experiences ​* Preparation
2.2	Finding directions​	​	​​*Guidance *Feedback *Support for the development of , knowledge, skill & clinical reasoning (Ax & Rx) *Accessing appropriate evidence *Mx acute conditions & injuries * Mx chronic conditions *Mx Burnt hand * Mx fractures *Mx stroke UL *Reasoning around DG eligibility	​*Appropriate guidelines	*Sharing experiences ​* Preparation
2.3	I know there’s a protocol but…​	​	*Supporting adherence	​​*Appropriate guidelines *Appropriate home programmes * Mobile Ax & Rx resources	*​Sharing experiences ​* Preparation
2.4	Sparse equipping​	​*Human resourcing * Strengthening supervision capacity	​*strengthening UG Curricula * Practical UG experiences *Regular opportuniites ro develop knowledge & skill *strengthening resourcefulness, creativity & innovation	* Appropriate HT equipment & resources	​
2.5	Seeing hands as OT ​	​	​*fostering enjoyable UG experiences; *Strengthening occupational focus in UG HT teaching *OBHT opportunities *Understanding indigenous occupations & drawing them into therapy	*​OBHT resources suitable for diverse caseload *Activity ideas	​
	Dynamics of surthrival ​					Comment / Disagree / Suggestions
3.1	Agentic momentum ​	​	​*supporting development of agency *supporting development of lifelong learning practices	​	​
3.2	Propelled by demand​	​	​	*Resources for diverse caseload	Preparation
3.3	Emotional supports​	*Responsive supervision	* Resilience (incl. coping strategies, building/harnessing support networks)	​	​*Debriefing /processing / sharing experience
3.4	Resources​	*Strengthening referral systems	​	Appropriate resources	​
3.5	Support for learning​	​? Appropriate courses	​*Strengthening UG experiences ​*Individual & group reflection *case discussion	​*Appropriate courses	​
3.6	Catalysts ​	*Accessible (immediacy & proximity) support & supervision *Access to expertise		​? Access to expertise	​

## Sheet: Eager & Willing
Number of hand patients each month		8
Percentage of caseload		0.1
Synopsis of experience delivering hand-injury care		HIC as a commserve is exciting yet daunting - little resources, knoweldge and experience.
Synopsis of CS placement		A township community with a large population in small semiurban area next to a city. Msotly chronic patients that were at hospital and now comes to a clinic.
Most memorable aspect/patient		Patient in mid fourties - mechanic by trade who suffered a stroke and recovered so well physically but who's right hand was non functional and had severe memory loss and as a result is unemployed. Very difficult to treat and did not have a super positive end to therapy at end of year as I could not do too much for him.
How did you experience delivering hand-injury care in CS?
Pseudonym / Avatar & brief reason
		Resonates?	Comment	Suggested change
Composite vignette		Yes
Theme 1: Submerged
1.1	Circle of poverty	Yes	Poor communities need even more healht promotion and prevention in the form of awareness making.
1.2	Strained system	Yes	Government needs to include more budgeting and be cognisant of the needs of primary health care.
1.3	Contraptions & contractures	Yes	Step down facilities should be more equiped to manage the patients being referred by referring hospitals.
1.4	Insurmountable need	Yes	To survive you need to celerbate the small gains.
1.5	Connecting through diversity	Partially
Theme 2: Starting somewhere
2.1	No idea	Yes	Havign no idea forces you to think on your feet and figure things out.
2.2	Finding directions	Yes	Knowing youre not alone and you can ask for help, immediately makes you feel more able to cope and less alone.
2.3	I know there's a protocol but…	Yes
2.4	Sparse equipping	Yes	More undergrad focus on hands and OTs amazing role in it.
2.5	Seeing hands as OT	Partially
Theme 3: Dynamics of Surthrival
3.1	Propelled by demand	Yes
3.2	Agentic Momentum	Yes
3.3	Support for learning	Yes
3.4	Resources	Yes
3.5	Emotional support	Yes
3.6	Catalysts	Yes	Access to mentorship programmes and real time support/COP is a wonderful benefit! Whatapp groups between graduates is also an idea.
WHAT are the support and development needs?
	​	System/Service​	Knowledge, skill, professional behaviour​	Resources​	Emotional support​
	Submerged​					Comment / Disagree / Suggestions
1.1	Circle of Poverty​	*Systemic development *OT resourcing in other sectors (?CS)	*Population intervention / promotion & prevention	​	*Preparation for CS *Processing experiences *Supported reflection
1.2	Strained System​	​	*Managing & strengthening sustainable services *Navigating myself in a system with a history *Personal & professional skills (incl. resilience)	​	​* Preparation
1.3	Contraptions & contractures​	​*Improvement in basic management of hand injuries/conditions *strengthening of human resources (medical & surgical) *strengthening referral systems	​*preventing &treating secondary complications	​	*Debriefing /processing / sharing experiences ​* Preparation	Varisty level awareness and lectures to the MDT on role of different MDT members could be an idea
1.4	Insurmountable need​	​	*Resilience *Professional skills	​	*Debriefing /processing / sharing experiences ​ * Preparation
1.5	Connecting through diversity​	​*Human resourcing to reduce language discordance	* Preparation *Cultural humility *Language learning *Effective use of interpreter *Responding to traditional healing practices	​	​*Debriefing /processing / sharing experiences ​* Preparation
	Starting somewhere​					Comment / Disagree / Suggestions
2.1	No idea to some idea​	​	​*Guidance *Feedback *Support for the development of clinical reasoning	​	​*Debriefing /processing / sharing experiences ​* Preparation
2.2	Finding directions​	​	​​*Guidance *Feedback *Support for the development of , knowledge, skill & clinical reasoning (Ax & Rx) *Accessing appropriate evidence *Mx acute conditions & injuries * Mx chronic conditions *Mx Burnt hand * Mx fractures *Mx stroke UL *Reasoning around DG eligibility	​*Appropriate guidelines	*Sharing experiences ​* Preparation
2.3	I know there’s a protocol but…​	​	*Supporting adherence	​​*Appropriate guidelines *Appropriate home programmes * Mobile Ax & Rx resources	*​Sharing experiences ​* Preparation
2.4	Sparse equipping​	​*Human resourcing * Strengthening supervision capacity	​*strengthening UG Curricula * Practical UG experiences *Regular opportuniites ro develop knowledge & skill *strengthening resourcefulness, creativity & innovation	* Appropriate HT equipment & resources	​
2.5	Seeing hands as OT ​	​	​*fostering enjoyable UG experiences; *Strengthening occupational focus in UG HT teaching *OBHT opportunities *Understanding indigenous occupations & drawing them into therapy	*​OBHT resources suitable for diverse caseload *Activity ideas	​
	Dynamics of surthrival ​					Comment / Disagree / Suggestions
3.1	Agentic momentum ​	​	​*supporting development of agency *supporting development of lifelong learning practices	​	​
3.2	Propelled by demand​	​	​	*Resources for diverse caseload	Preparation
3.3	Emotional supports​	*Responsive supervision	* Resilience (incl. coping strategies, building/harnessing support networks)	​	​*Debriefing /processing / sharing experience
3.4	Resources​	*Strengthening referral systems	​	Appropriate resources	​
3.5	Support for learning​	​? Appropriate courses	​*Strengthening UG experiences ​*Individual & group reflection *case discussion	​*Appropriate courses	​
3.6	Catalysts ​	*Accessible (immediacy & proximity) support & supervision *Access to expertise		​? Access to expertise	​

## Sheet: Dedicatedly Winging-it
Number of hand patients each month		Around 30
Percentage of caseload		0.5
Synopsis of experience delivering hand-injury care		It will be daunting and intimidating at first, stay calm, you will get much better
Synopsis of CS placement		In a township in rural KZN, in the Zululands. We worked out of a residential parkhome for 80% of our time
Most memorable aspect/patient		Seeing one of my burn patients 3 years old grow in confidence in using his hand functionally when playing as his finger burns began to heal through the pressure garments and splints I had facbricated for him
How did you experience delivering hand-injury care in CS?
Pseudonym / Avatar & brief reason		Dedicatedly winging it
		Resonates?	Comment	Suggested change
Composite vignette		Yes	So wonderfully articulated and told
Theme 1: Submerged
1.1	Circle of poverty	Yes
1.2	Strained system	Yes
1.3	Contraptions & contractures	Yes
1.4	Insurmountable need	Yes
1.5	Connecting through diversity	Partially		had to be reflective and make a concerted effort to be aware of my cultural blinders such that I can recognise the common and shared humanity amongst us , I like the term cultural humility that was used
Theme 2: Starting somewhere		Yes	I like starting somewhere, it feels like it fits in better with the other themes, as I think the last theme resonated more with "getting soemewhere"
2.1	No idea	Partially	I like no idea to some idea more
2.2	Finding directions	Yes
2.3	I know there's a protocol but…	Yes
2.4	Sparse equipping	Yes
2.5	Seeing hands as OT	Yes
Theme 3: Dynamics of Surthrival		Yes
3.1	Propelled by demand	Yes
3.2	Agentic Momentum	Yes
3.3	Support for learning	Yes
3.4	Resources	Yes
3.5	Emotional support	Yes
3.6	Catalysts	Yes
WHAT are the support and development needs?
	​	System/Service​	Knowledge, skill, professional behaviour​	Resources​	Emotional support​
	Submerged​					Comment / Disagree / Suggestions
1.1	Circle of Poverty​	*Systemic development *OT resourcing in other sectors (?CS)	*Population intervention / promotion & prevention	​	*Preparation for CS *Processing experiences *Supported reflection
1.2	Strained System​	​	*Managing & strengthening sustainable services *Navigating myself in a system with a history *Personal & professional skills (incl. resilience)	​	​* Preparation
1.3	Contraptions & contractures​	​*Improvement in basic management of hand injuries/conditions *strengthening of human resources (medical & surgical) *strengthening referral systems	​*preventing &treating secondary complications	​	*Debriefing /processing / sharing experiences ​* Preparation
1.4	Insurmountable need​	​	*Resilience *Professional skills	​	*Debriefing /processing / sharing experiences ​ * Preparation
1.5	Connecting through diversity​	​*Human resourcing to reduce language discordance	* Preparation *Cultural humility *Language learning *Effective use of interpreter *Responding to traditional healing practices	​	​*Debriefing /processing / sharing experiences ​* Preparation
	Starting somewhere​					Comment / Disagree / Suggestions
2.1	No idea to some idea​	​	​*Guidance *Feedback *Support for the development of clinical reasoning	​	​*Debriefing /processing / sharing experiences ​* Preparation
2.2	Finding directions​	​	​​*Guidance *Feedback *Support for the development of , knowledge, skill & clinical reasoning (Ax & Rx) *Accessing appropriate evidence *Mx acute conditions & injuries * Mx chronic conditions *Mx Burnt hand * Mx fractures *Mx stroke UL *Reasoning around DG eligibility	​*Appropriate guidelines	*Sharing experiences ​* Preparation
2.3	I know there’s a protocol but…​	​	*Supporting adherence	​​*Appropriate guidelines *Appropriate home programmes * Mobile Ax & Rx resources	*​Sharing experiences ​* Preparation
2.4	Sparse equipping​	​*Human resourcing * Strengthening supervision capacity	​*strengthening UG Curricula * Practical UG experiences *Regular opportuniites ro develop knowledge & skill *strengthening resourcefulness, creativity & innovation	* Appropriate HT equipment & resources	​
2.5	Seeing hands as OT ​	​	​*fostering enjoyable UG experiences; *Strengthening occupational focus in UG HT teaching *OBHT opportunities *Understanding indigenous occupations & drawing them into therapy	*​OBHT resources suitable for diverse caseload *Activity ideas	​
	Dynamics of surthrival ​					Comment / Disagree / Suggestions
3.1	Agentic momentum ​	​	​*supporting development of agency *supporting development of lifelong learning practices	​	​
3.2	Propelled by demand​	​	​	*Resources for diverse caseload	Preparation
3.3	Emotional supports​	*Responsive supervision	* Resilience (incl. coping strategies, building/harnessing support networks)	​	​*Debriefing /processing / sharing experience
3.4	Resources​	*Strengthening referral systems	​	Appropriate resources	​
3.5	Support for learning​	​? Appropriate courses	​*Strengthening UG experiences ​*Individual & group reflection *case discussion	​*Appropriate courses	​
3.6	Catalysts ​	*Accessible (immediacy & proximity) support & supervision *Access to expertise		​? Access to expertise	​
